# Supplementary material for: SMURF1 Amplification Promotes Invasiveness in Pancreatic Cancer
Source: PubMed Central journal article supplement (PMC3161761; doi:10.1371/journal.pone.0023924), 2011-08-22
Supplement: pone.0023924.s001.pdf [file pone.0023924.s001.pdf]

**Table S1. siRNA sequences targeting *SMURF1***

| <b>Name</b>      | <b>Sequence</b>            |
|------------------|----------------------------|
| <i>SMURF1</i> #1 | 5'-GCACUAUGAUCUAUAUGUU-3'  |
| <i>SMURF1</i> #2 | 5'-GGAGGAGACCUGCGGGUUU-3'  |
| <i>SMURF1</i> #3 | 5'-GAUCGACAUUCCACCAUUAU-3' |
| <i>SMURF1</i> #4 | 5'-AAGAAUACGUCCGGUUGUA-3'  |
